# Supplementary material
Source: PubMed Central journal article supplement (PMC3617475)
Supplement: NIHMS52639-supplement-1.pdf [file NIHMS52639-supplement-1.pdf]

Supplementary Information S1 (Box) **Modelling the effects of buffers in realistic coupling regimes.**

A lot of insight into the mechanisms of coupling between  $\text{Ca}^{2+}$  channels and  $\text{Ca}^{2+}$  sensors can be obtained by modelling the diffusion of  $\text{Ca}^{2+}$  and its reaction with buffers. As in other fields of Neuroscience, the Hopfield quote “build it, and you understand it” perfectly applies. How can one model the  $\text{Ca}^{2+}$  transient?

In a simple scenario, the steady-state solution to the linearized reaction-diffusion problem is obtained analytically<sup>1,2</sup>. In this framework, the  $\text{Ca}^{2+}$  concentration ( $[\text{Ca}^{2+}]$ ) can be described by a simple equation, which is comprised of a  $1/r$  term (representing diffusion) and an exponential term (representing buffering):

$$[\text{Ca}^{2+}] = \frac{i_{\text{Ca}}}{4\pi F D_{\text{Ca}}} \frac{1}{r} \exp(-r/\lambda) \quad (\text{Eq. 1})$$

with  $\lambda = \sqrt{D_{\text{Ca}} / (k_{\text{on}} [\text{B}])}$ ,

where  $i_{\text{Ca}}$  is the  $\text{Ca}^{2+}$  current,  $F$  is the Faraday constant,  $D_{\text{Ca}}$  is the diffusion coefficient of  $\text{Ca}^{2+}$ ,  $r$  is radial distance from a source,  $\lambda$  is the length constant,  $k_{\text{on}}$  is the  $\text{Ca}^{2+}$ -binding rate of the buffer, and  $[\text{B}]$  is the concentration of the buffer<sup>1</sup>.

Although the linear approach represents a useful approximation for short distances from the source, it does not account for the time course of the  $\text{Ca}^{2+}$  transient, the phenomenon of buffer saturation, and the presence of fixed and mobile buffers<sup>1</sup>.

The limitations can be overcome by obtaining the time-dependent solution to the full reaction-diffusion equations<sup>3-7</sup>. This can be done by numerically solving a set of partial differential equations, containing the  $\text{Ca}^{2+}$  and buffer concentrations as a function of space and time, as well as several partial derivatives.

Everything starts from Fick’s first and second law of diffusion<sup>8</sup>. Fick’s first law relates the diffusive [flux](#) to the concentration field. In the simplest possible form in one spatial dimension, the first law is

$$J = D_{\text{Ca}} \frac{\partial [\text{Ca}^{2+}]}{\partial x}, \quad (\text{Eq. 2})$$

where  $J$  is the flux in units  $\text{mol s}^{-1} \text{m}^{-2}$ . From the law of mass conservation and Fick's first law, Fick's second law can be derived<sup>2</sup>.

$$\frac{\partial[\text{Ca}^{2+}]}{\partial t} = \frac{\partial J}{\partial x} = \frac{\partial}{\partial x} \left( D_{\text{Ca}} \frac{\partial[\text{Ca}^{2+}]}{\partial x} \right) \quad (\text{Eq. 3})$$

Equation 3 gives the partial differential equation that has to be solved. Equation 2 gives the boundary condition near the source. In addition, a second boundary condition has to be implemented remote from the source. This is usually a reflective boundary condition, which is given as  $\partial[\text{Ca}^{2+}] / \partial x = 0$  for  $x \rightarrow x_{\text{max}}$ . As there is no gradient at this distance,  $\text{Ca}^{2+}$  cannot escape beyond this point. Furthermore, initial conditions have to be appropriately chosen. For example,  $[\text{Ca}^{2+}]$  at  $t = 0$  is set to the resting value. The partial differential equations can be solved numerically, e.g. using NDSolve of Mathematica<sup>3,4,9</sup>.

Finally, the effect of the  $\text{Ca}^{2+}$  transient on transmitter release has to be simulated, using models of transmitter release derived from  $\text{Ca}^{2+}$  uncaging experiments<sup>10-14</sup>. Based on a 6- to 8-state reaction scheme, a set of ordinary differential equations can be formulated, which can be solved numerically.

The cookbook recipe (Eq. 1 – 3) describes the backbone of the simulations, defining the  $\text{Ca}^{2+}$  transients from a point source in the absence of buffers. For a more realistic simulation, several extensions have to be made. In the presence of buffers, the right hand side of equation 3 has to be extended by the sum of reaction terms. To simulate  $\text{Ca}^{2+}$  transients originating from  $\text{Ca}^{2+}$  channel clusters or other distributed sources, the one-dimensional simulations have to be extended into two or three dimensions<sup>5-7</sup>.

Early studies have used several different approximations, such as the steady-state excess buffer approximation (EBA; buffer concentration is so high that it changes little during  $\text{Ca}^{2+}$  inflow) and rapid buffer approximation (RBA; buffers are so fast that they are in chemical equilibrium with  $\text{Ca}^{2+}$  at every point in time and space<sup>7</sup>). As computer power has increased, these approximations have become unnecessary.

1. Neher, E. Usefulness and limitations of linear approximations to the understanding of  $\text{Ca}^{++}$  signals. *Cell Calcium* **24**, 345-357 (1998).
2. Crank, J. *The Mathematics of Diffusion* (Clarendon Press, Oxford, 1975).

3. Bucurenciu, I., Kulik, A., Schwaller, B., Frotscher, M. & Jonas, P. Nanodomain coupling between  $\text{Ca}^{2+}$  channels and  $\text{Ca}^{2+}$  sensors promotes fast and efficient transmitter release at a cortical GABAergic synapse. *Neuron* **57**, 536–545 (2008).
4. Bucurenciu, I., Bischofberger, J. & Jonas, P. A small number of open  $\text{Ca}^{2+}$  channels trigger transmitter release at a central GABAergic synapse. *Nature Neurosci.* **13**, 19–21 (2010).
5. Matveev, V., Zucker, R. S. & Sherman, A. Facilitation through buffer saturation: constraints on endogenous buffering properties. *Biophys. J.* **86**, 2691–2709 (2004).
6. Klingauf, J. & Neher, E. Modeling buffered  $\text{Ca}^{2+}$  diffusion near the membrane: implications for secretion in neuroendocrine cells. *Biophys. J.* **72**, 674–690 (1997).
7. Smith, G. D. *Modelling local and global calcium signals using reaction-diffusion equations*. In Computational Neuroscience, E. de Schutter, ed. (Boca Raton, FL, CRC Press 2001), pp. 49 – 85.
8. Fick, A. Über Diffusion. *Ann. Physik* **170**, 59–86 (1855).
9. Trott, M. *The Mathematica guidebook for numerics* (Springer, New York, 2006).
10. Schneggenburger, R. & Neher, E. Intracellular calcium dependence of transmitter release rates at a fast central synapse. *Nature* **406**, 889–893 (2000).
11. Bollmann, J.H., Sakmann, B. & Borst J.G.G. Calcium sensitivity of glutamate release in a calyx-type terminal. *Science* **289**, 953–957 (2000).
12. Lou, X., Scheuss, V. & Schneggenburger, R. Allosteric modulation of the presynaptic  $\text{Ca}^{2+}$  sensor for vesicle fusion. *Nature* **435**, 497–501 (2005).
13. Sun, J. *et al.* A dual- $\text{Ca}^{2+}$ -sensor model for neurotransmitter release in a central synapse. *Nature* **450**, 676–682 (2007).
14. Sakaba, T. Two  $\text{Ca}^{2+}$ -dependent steps controlling synaptic vesicle fusion and replenishment at the cerebellar basket cell terminal. *Neuron* **57**, 406–419 (2008).
